# Supplementary material
Source: Springer Nature journal article supplement (https://www.springermedizin.de/resource/supplementary/12876_2003_46_MOESM3_ESM.pdf/9438650)
Supplement: MOESM3 [file 9438650]

Table 2. Sensitivity of the bacteria isolated from jejunal aspirate to various antibiotics.

| Bacteria                          | Sensitive to  |                            |                                |               |               |                            |                             |                 |
|-----------------------------------|---------------|----------------------------|--------------------------------|---------------|---------------|----------------------------|-----------------------------|-----------------|
|                                   | Ampicillin    | Ampicillin<br>Sulbactam    | Tetracyclin                    | Cotrimox      | Erythro       | Norflox                    | Ciproflo                    | Cefalexin       |
| <i>E. coli</i> (n = 12)           | 3             | 5                          | 4                              | 5             | NT            | 7                          | 9                           | 5               |
| <i>Streptococcus sp.</i> (n = 12) | 9             | 11                         | 6                              | 5             | 9             | 11                         | 12                          | 9               |
| <i>E. fecalis</i> (n = 3)         | 3             | 3                          | 1                              | 0             | 1             | 1                          | 1                           | NT              |
| <i>E. fecium</i> (n = 1)          | 1             | 1                          | 0                              | 0             | 1             | 0                          | 0                           | NT              |
| <i>S. aureus</i> (n = 5)          | 3             | 4                          | 2                              | 5             | 3             | 4                          | 5                           | 3               |
| <i>C. freundii</i> (n=1)          | 0             | 1                          | 0                              | 1             | NT            | 1                          | 1                           | 1               |
| <i>K. pneumoniae</i> (n = 5)      | 1             | 3                          | 2                              | 3             | NT            | 3                          | 4                           | 3               |
| <i>P. mirabilis</i> (n =1)        | 1             | 1                          | 0                              | 0             | NT            | 1                          | 1                           | 1               |
| <i>A. baumannii</i> ( n = 3)      | 0             | 0                          | 2                              | 2             | NT            | 3                          | 3                           | 3               |
| <i>P. aeruginosa</i> (n = 3)      | NT            | NT                         | 1                              | 2             | NT            | 3                          | 3                           | NT              |
| <i>B. melaninogenicus</i> (n = 1) | 0             | 1                          | 1                              | 1             | 0             | 0                          | 0                           | 0               |
| Total (n = 47)                    | 21/44<br>(48) | 30/44 <sup>*</sup><br>(68) | 19/47 <sup>*, \$</sup><br>(40) | 24/47<br>(51) | 14/22<br>(64) | 34/47 <sup>*</sup><br>(72) | 39/47 <sup>\$</sup><br>(83) | 25/40<br>(62.5) |

Figures within parenthesis indicate percentages. NT: not tested.

\*p < 0.01; \$p <0.0001 (Chi-squared test)
